# Supplementary material for: Sex-specific predictor analyses for the incidence of recurrent headaches in German schoolchildren
Source: PubMed Central journal article supplement — Psychosoc Med. 2012 Aug 7;9:Doc03. doi: 10.3205/psm000081 (PMC3413875; doi:10.3205/psm000081), 2012-08-07
Supplement: PSM-09-03-s-001.pdf [file PSM-09-03-s-001.pdf]

## Appendix: Predictor Variables (Wave 1) for Parents Data

| Predictor Variable                        | Item or Example Item                                                                                                                                                                                                                     | Number of Items | Item Source <sup>b</sup>                       | Internal Consistency <sup>c</sup> (Cronbach's $\alpha$ ) |
|-------------------------------------------|------------------------------------------------------------------------------------------------------------------------------------------------------------------------------------------------------------------------------------------|-----------------|------------------------------------------------|----------------------------------------------------------|
| <b>School variables</b>                   |                                                                                                                                                                                                                                          |                 |                                                |                                                          |
| Time spent on homework                    | <i>How much time does your child spend on homework per day?</i>                                                                                                                                                                          | 1               | Larsson, 1988                                  | -                                                        |
| Academic problems                         | <i>Does your child have any academic or other problems at school?</i>                                                                                                                                                                    | 1               | CBCL 4-18                                      | -                                                        |
| Deteriorating grades                      | <i>Has your child's academic achievement worsened clearly since her last school report (more than one letter grade)?</i>                                                                                                                 | 1               | CBCL 4-18                                      | -                                                        |
| Danger of grade repeat                    | <i>Is there a danger that your child will have to repeat a grade?</i>                                                                                                                                                                    | 1               | CBCL 4-18                                      | -                                                        |
| School stress                             | Examples:<br><i>How often is your child teased or bullied by other students?</i><br><i>How often is your child afraid of school or of certain teachers?</i>                                                                              | 6               | Karwautz et al., 1999;<br>Anttila et al., 2000 | $\alpha=.66$                                             |
| <b>Emotional and behavioural problems</b> |                                                                                                                                                                                                                                          |                 |                                                |                                                          |
| Dysfunctional stress coping strategies    | <i>What happens if your child feels under pressure in school or is put under pressure by other children?</i><br>Examples:<br><i>She would like to pretend to be ill.<sup>1</sup></i><br><i>She complains about everything.</i>           | 8               | SVF-KJ                                         | $\alpha=.82$                                             |
| Reaction to failure                       | Examples:<br><i>My child gets very disappointed when she fails.</i><br><i>If something doesn't work, she gets impatient quickly.</i>                                                                                                     | 3               | HAPEF-K                                        | $\alpha=.78$                                             |
| Anger expression                          | <i>How does your child react when she gets angry or is annoyed by somebody else?</i><br>Items:<br><i>If someone annoys her, she loses her temper.</i><br><i>She makes sure everyone knows how angry she is by yelling and screaming.</i> | 2               | STAXI Anger Out                                | $\alpha=.75$                                             |
| Anger control                             | <i>How does your child react when she gets angry or is annoyed by somebody else?</i><br>Items:<br><i>She controls her anger.</i><br><i>She retains her composure.</i>                                                                    | 2               | STAXI Anger Control                            | $\alpha=.74$                                             |

|                              |                                                                                                                                                                                                                                                                                    |    |                    |              |
|------------------------------|------------------------------------------------------------------------------------------------------------------------------------------------------------------------------------------------------------------------------------------------------------------------------------|----|--------------------|--------------|
| Anxiousness/<br>Depressivity | <i>Please indicate how frequently your child experienced the following feelings in the last 3 months.</i><br>Examples:<br><i>She was unhappy, sad, or depressed.</i><br><i>She was very fearful or anxious.</i><br><i>She had bad dreams.</i><br><i>She worried a lot of time.</i> | 11 | CBCL 4-18<br>RCMAS | $\alpha=.85$ |
| Hyperactivity                | <i>Please indicate how frequently your child exhibited the following behaviours in the last 3 months.</i><br>Examples:<br><i>She couldn't sit still, was restless or hyperactive.</i><br><i>She couldn't concentrate, or couldn't pay attention for long.</i>                      | 3  | CBCL 4-18          | $\alpha=.75$ |
| Aggressive<br>behaviour      | <i>Please indicate how frequently your child exhibited the following behaviours in the last 3 months.</i><br>Examples:<br><i>She threatened people.</i><br><i>She bullied or was mean to others.</i>                                                                               | 3  | CBCL 4-18          | $\alpha=.76$ |

<sup>a</sup> For the sake of simplicity, we will use the feminine form

<sup>b</sup> CBCL 4-18 (Child Behaviour Checklist): (Achenbach, 1991), German version: Döpfner et al., 1994  
RCMAS (Revised Children's Manifest Anxiety Scale): Reynolds and Richmond, 1978; German version: Boehnke et al., 1986

SVF-KJ (German Coping Questionnaire for Children and Adolescents): Hampel et al., 2001

HAPEF-K (Hamburger Personality Questionnaire for Children): Wagner and Baumgärtel, 1978

STAXI (State-Trait Anger Expression Inventory): Spielberger, 1988; German version: Schwenkmezger et al., 1992

<sup>c</sup> Parents' data (Wave 1)

## References

1. Achenbach TM. Manual for the Child Behavior Checklist/4-18 and 1991 profile. Burlington, VT: University of Vermont, Department of Psychiatry; 1991.
2. Döpfner M, Schmeck K, Berner W, Lehmkuhl G, Poustka F. Zur Reliabilität und faktoriellen Validität der Child Behavior Checklist: Eine Analyse in einer klinischen und einer Feldstichprobe. *Zeitschrift für Kinder- und Jugendpsychiatrie* 1994;22:189-205.
3. Reynolds CR, Richmond BO. What I Think and Feel: A Revised Measure of Children's Manifest Anxiety. *Journal of Abnormal Child Psychology* 1978;6(2):271-280.
4. Boehnke K, Silbereisen RK, Reynolds CR, Richmond BO. What I think and feel - German experience with the revised form of the Children's Manifest Anxiety Scale. *Personality and Individual Differences* 1986;7(4):553-560.
5. Hampel P, Petermann F, Dickow B. Stressverarbeitungsfragebogen von Janke und Erdmann angepasst für Kinder und Jugendliche (SVF-KJ) [German Coping Questionnaire for Children and Adolescents]. Göttingen: Hogrefe; 2001.
6. Wagner H, Baumgärtel F. Hamburger Persönlichkeitsfragebogen für Kinder (HAPEF-K). Handanweisung. Göttingen: Hogrefe; 1978.
7. Spielberger CD. State-Trait Anger Expression Inventory (STAXI). Odessa: Psychological Assessment Resources; 1988.
8. Schwenkmezger P, Hodapp V, Spielberger CD. Das State-Trait-Aergerausdrucks-Inventar (STAXI). Handbuch [The German State-Trait-Anger-Expression-Inventory (STAXI) Manual]. Bern: Huber; 1992.

Attachment 1: Appendix to Gaßmann J, Barke A, van Gessel H, Kröner-Herwig B. Sex-specific predictor analyses for the incidence of recurrent headaches in German schoolchildren. *GMS Psychosoc Med.* 2012;9:Doc03. DOI: 10.3205/psm000081  
Online available from: <http://www.egms.de/en/journals/psm/2012-9/psm000081.shtml>
